# Supplementary material for: High yield engineered nanovesicles from ADSC with enriched miR-21-5p promote angiogenesis in adipose tissue regeneration
Source: PubMed Central journal article supplement (PMC9758932; doi:10.1186/s40824-022-00325-y), 2022-12-17
Supplement: 40824_2022_325_MOESM1_ESM.pdf [file 40824_2022_325_MOESM1_ESM.pdf]

1151

1152

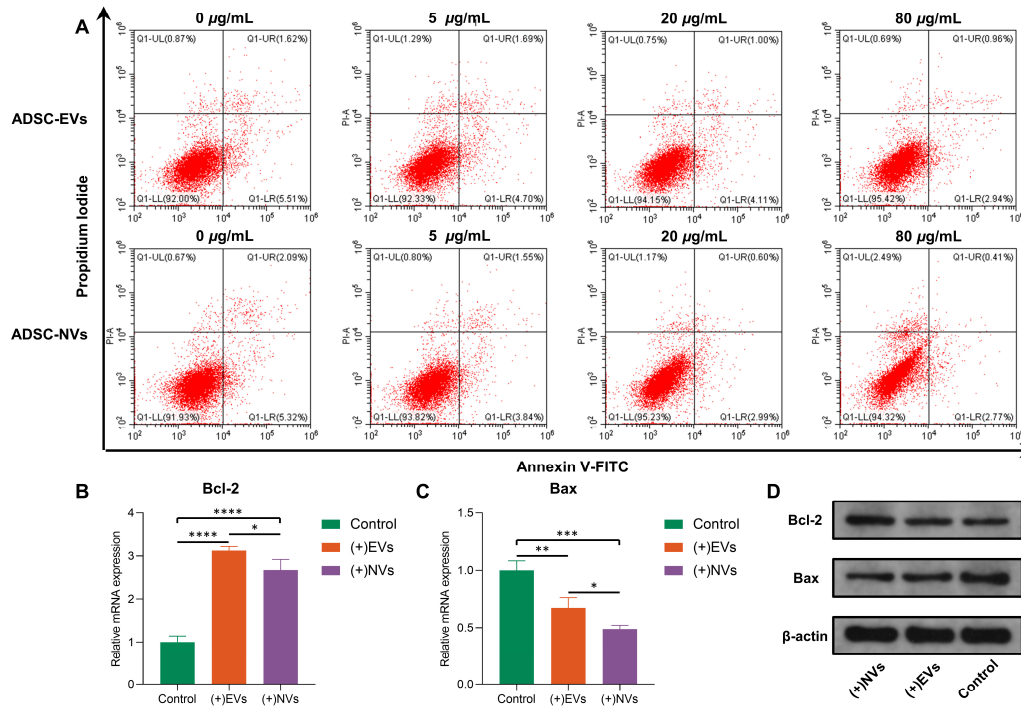

1153

1154 **Figure S1:** Anti-apoptosis mediated by ADSC-NVs *in vitro*. (A) Viability of  
 1155 ADSC-NVs or ADSC-EVs treated HUVECs was measured by Annexin-V-  
 1156 FITC/PI staining. We defined Annexin V+/PI- as early apoptotic stage, Annexin  
 1157 V+/PI+ as apoptotic cells, and Annexin V-/PI+ as dead cells. Total apoptotic rate  
 1158 was the sum of early apoptotic rate and apoptotic rate. (B, C) mRNA  
 1159 expressions of B-cell lymphoma-2 (Bcl-2) (B) and BCL2-associated X (Bax) (C)  
 1160 in HUVECs treated with ADSC-NVs or ADSC-EVs were analyzed using qRT-  
 1161 PCR (n = 3 per group). (D) Protein levels of Bcl-2 and Bax in HUVECs after  
 1162 ADSC-NVs or ADSC-EVs stimulation. \*p < 0.05, \*\*p < 0.01, \*\*\*p < 0.001,  
 1163 \*\*\*\*p < 0.0001.
