# Supplementary material for: High yield engineered nanovesicles from ADSC with enriched miR-21-5p promote angiogenesis in adipose tissue regeneration
Source: PubMed Central journal article supplement (PMC9758932; doi:10.1186/s40824-022-00325-y), 2022-12-17
Supplement: 40824_2022_325_MOESM2_ESM.pdf [file 40824_2022_325_MOESM2_ESM.pdf]

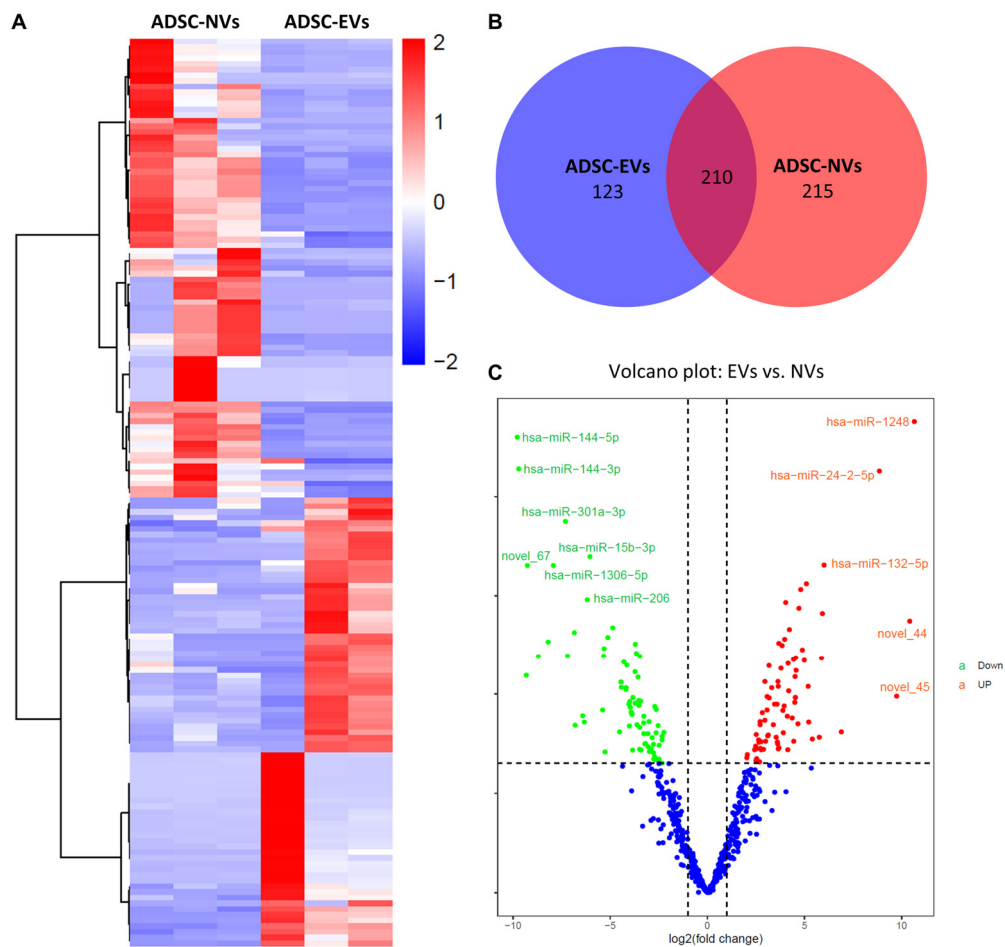

1165

1166 **Figure S2:** Differential microRNA expression profile of ADSC-NVs and ADSC-  
 1167 EVs. (A) Hierarchical clustering assay of differentially expressed miRNAs  
 1168 between ADSC-NVs and ADSC-EVs. (B) Venn diagram showing 210 shared  
 1169 miRNA species between ADSC-EVs and ADSC-NVs, 215 upregulated miRNAs  
 1170 and 123 downregulated miRNAs in ADSC-NVs. (C) Volcano plot of miRNAs in  
 1171 ADSC-NVs and ADSC-EVs. The red points indicate significantly upregulated  
 1172 miRNAs (fold change  $\leq 0.5$  and  $\geq 2$  and P value  $\leq 0.05$ ) in ADSC-NVs,  
 1173 whereas green points indicate upregulated miRNAs in ADSC-EVs.
