# Supplementary material for: High yield engineered nanovesicles from ADSC with enriched miR-21-5p promote angiogenesis in adipose tissue regeneration
Source: PubMed Central journal article supplement (PMC9758932; doi:10.1186/s40824-022-00325-y), 2022-12-17
Supplement: 40824_2022_325_MOESM3_ESM.pdf [file 40824_2022_325_MOESM3_ESM.pdf]

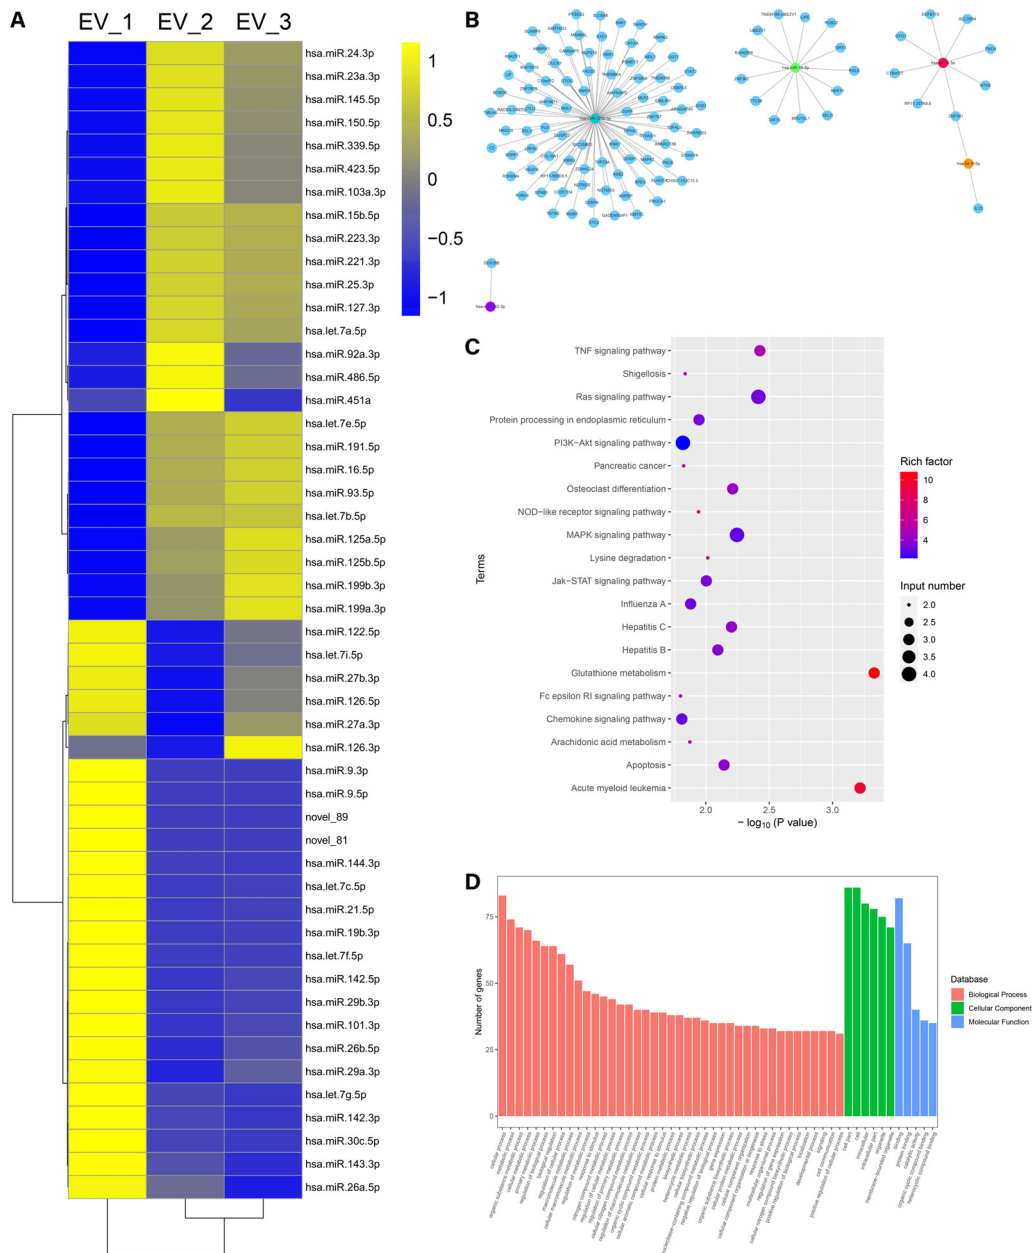

1151

1152 **Figure S3:** Target analysis of the top 50 highly expressed miRNAs in ADSC-

1153 EVs. (A) Heatmap of the top 50 highly expressed miRNAs in ADSC-EVs. (B)

1154 Cytoscape network of the interaction of the top five miRNAs abundant in ADSC-

1155 EVs and their predicted target genes (blue). (C) KEGG pathway map of the

1156 predicted target genes of the top five miRNAs enriched in ADSC-EVs. (D) GO

1157 terms of top five miRNAs of ADSC-EVs in biological process, cellular

1158 component, and molecular functions.

1159

1160

1161
