# Supplementary material for: High yield engineered nanovesicles from ADSC with enriched miR-21-5p promote angiogenesis in adipose tissue regeneration
Source: PubMed Central journal article supplement (PMC9758932; doi:10.1186/s40824-022-00325-y), 2022-12-17
Supplement: 40824_2022_325_MOESM4_ESM.pdf [file 40824_2022_325_MOESM4_ESM.pdf]

1151

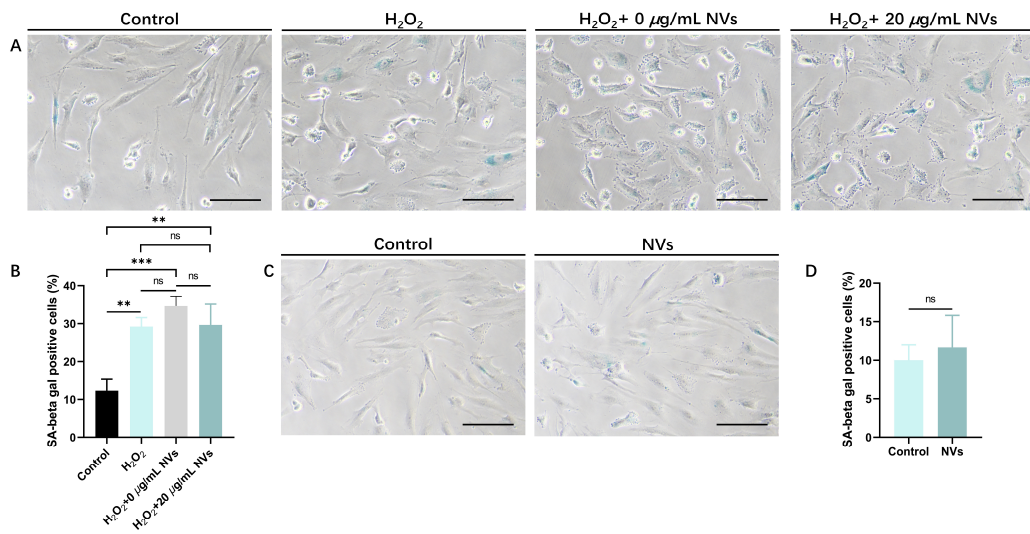

1152

1153 **Figure S4:** Negligible effect of ADSC-NVs on cell senescence *in vitro*. HUVECs

1154 were exposed to H<sub>2</sub>O<sub>2</sub> (50 μM, 2h) to induce senescence and then incubated

1155 with 0 μg/mL or 20μg/mL ADSC-NVs for 24 h. (A) Representative images of SA

1156 β-gal staining of HUVECs. Scale bar: 100 μm. (B) Quantitation of SA β-gal-

1157 positive HUVECs (n = 3 per group). Besides, HUVECs cultured in complete

1158 medium were incubated with or without 20μg/mL ADSC-NVs for 24 h and

1159 stained with SA β-gal. (C) Representative images of SA β-gal staining of

1160 HUVECs. Scale bar: 100 μm. (D) Quantitation of SA β-gal-positive HUVECs (n

1161 = 3 per group). ns, no significant difference, \*\*p < 0.01, \*\*\*p < 0.001.

1162

1163
