# Supplementary material for: High yield engineered nanovesicles from ADSC with enriched miR-21-5p promote angiogenesis in adipose tissue regeneration
Source: PubMed Central journal article supplement (PMC9758932; doi:10.1186/s40824-022-00325-y), 2022-12-17
Supplement: 40824_2022_325_MOESM5_ESM.pdf [file 40824_2022_325_MOESM5_ESM.pdf]

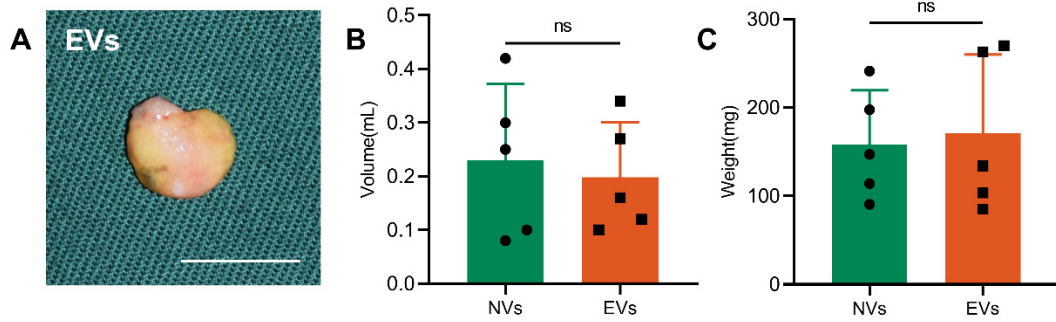

1194

1195 **Figure S5:** Fat graft with ADSC-EVs. BALB/c nude mice were administered  
 1196 injection of a mixture of fat granules and ADSC-EVs (20  $\mu\text{g}/\text{mL}$ ). The grafts  
 1197 were harvested at 12 weeks post-transplantation for further analysis. (A)  
 1198 Macroscopic images of the fat grafts. Scale bar: 1 cm. Quantitative analysis of  
 1199 grafts shows no significant difference of volume (B) and weight (C) between  
 1200 ADSC-NVs (20  $\mu\text{g}/\text{mL}$ ) group and ADSC-EVs (20  $\mu\text{g}/\text{mL}$ ) group (n = 5 per  
 1201 group). ns, no significant difference.
